# Supplementary material for: New York City greenhouse gas emissions estimated with inverse modeling of aircraft measurements
Source: Oxford University Press journal article supplement (doi:10.1525/elementa.2021.00082), 2022-01-01
Supplement: all_results.xlsx [file all_results.xlsx]

## Sheet: Contents
Contents
This file contains the estimated emission rates for CO2 and CH4 used in the main manuscript:
Sheet 2 ("Base Case") gives total posterior and prior emission rates calculated for the New York-Newark urban area using the base case ensemble
Sheets 3 to 7 ("B1" to "B5") give urban area emission rates for the background sensitivity tests
Sheets 8 to 15 ("Pb1" to "Pb8") give urban area emission rates for the prior flux error covariance sensitivity tests
Sheet 16 ("non_nested") gives urban area emission rates for the non-nested (i.e. d03 only) inversion
Sheet 17 ("Base_Case 5_borough") gives emission rates calculated for five boroughs of New York City using the base case ensemble
Sheet 18 ("representative_inventory") gives emission rates calculated from the ACES and Vulcan inventory for dates and times of day that correspond to the flights (both for the urban area and the five boroughs of NYC)
NOTE: Here we provide individual estimates for each of the ensemble members and sensitivity analyses performed and shown in the main manuscript.
However, we remind the reader that our best estimate is derived as the mean of the base case ensemble estimates for each of the flights and that a single
realisation is not meaningful itself other than to compute the ensemble mean.
The flights are labelled RF1 to RF9
The models are labelled as described in the caption of Figure 1 in the main manuscript
The background sensitivity tests are labelled as described in SI section S9
The prior flux error covariance sensitivity tests are labelled as follows:
Label	Relative uncertainty	Correlation length (km)
Pb1	0.5	4
Pb2	0.5	10
Pb3	0.5	12
Pb4	1	4
Pb5	1	12
Pb6	2	4
Pb7	2	10
Pb8	2	12

## Sheet: Base_Case
	ACES CO2										EDGAR v4.2 CH4
	ER2	ER5	GF2	GF5	HR2	HR5	NA2	NA5			ER2	ER5	GF2	GF5	HR2	HR5	NA2	NA5
RF1	173.987	176.05	159.229	159.31	120.268	120.808	115.226	114.02		RF1	1.02063	1.05478	0.957338	0.943563	0.753163	0.700267	0.658055	0.652408
RF2	193.734	190.39	213.303	220.82	226.453	230.088	219.69	201.697		RF2	0.808655	0.828333	0.959518	0.9674	0.905755	0.905255	0.90096	0.866047
RF3	113.042	112.839	92.2936	91.0331	115.596	113.703	102.366	101.391		RF3	0.583584	0.576976	0.490495	0.471996	0.589	0.632445	0.528793	0.508725
RF4	107.966	107.353	94.0897	99.5805	109.69	97.7188	141.505	135.38		RF4	0.667571	0.706697	0.556344	0.578563	0.695683	0.677631	0.767489	0.773691
RF5	152.417	155.575	126.672	121.634	183.969	179.996	180.771	175.398		RF5	1.04665	1.02505	1.00555	0.992551	1.30976	1.21434	1.2338	1.23758
RF6	193.326	181.723	195.365	191.756	149.794	147.061	225.737	213.988		RF6	0.889683	0.938088	1.02422	0.933153	0.810733	0.764227	1.20785	1.15522
RF7	115.403	117.259	138.673	136.176	133.055	134.951	138.822	136.729		RF7	0.636053	0.635289	0.902639	0.857701	0.857087	0.868887	0.826761	0.865405
RF8	75.448	71.5212	98.337	99.5325	99.9034	87.7112	106.071	100.55		RF8	0.360368	0.353695	0.403288	0.404203	0.358188	0.362797	0.457924	0.445921
RF9	100.702	98.1897	83.3524	78.1404	76.6317	74.65	88.952	83.5709		RF9	0.457561	0.44074	0.449186	0.447212	0.355036	0.350464	0.475523	0.469423
	EDGAR v5.0 CO2										EDGAR v5.0 CH4
	ER2	ER5	GF2	GF5	HR2	HR5	NA2	NA5			ER2	ER5	GF2	GF5	HR2	HR5	NA2	NA5
RF1	140.722	142.235	129.68	129.81	92.2637	92.7608	88.6503	89.0988		RF1	0.65405	0.653215	0.645296	0.6395	0.417234	0.40314	0.397044	0.395405
RF2	148.962	147.935	177.987	178.562	196.467	199.171	185.847	178.672		RF2	0.559335	0.55897	0.676463	0.668703	0.755789	0.747617	0.688311	0.669897
RF3	98.6951	97.7497	78.5767	77.9714	102.27	101.856	85.9528	84.1956		RF3	0.542916	0.512005	0.423249	0.396124	0.542151	0.526917	0.441034	0.413704
RF4	92.9405	92.7847	79.011	79.496	91.7233	88.0174	118.861	115.93		RF4	0.462867	0.434031	0.367196	0.370937	0.431345	0.387288	0.537473	0.533647
RF5	130.532	124.45	107.252	104.758	149.211	136.371	157.287	154.858		RF5	0.62526	0.594201	0.502896	0.510746	0.668851	0.619878	0.680592	0.683496
RF6	178.957	165.896	178.428	175.375	129.697	127.341	203.627	201.433		RF6	0.713044	0.674123	0.7009	0.634292	0.609004	0.587734	0.784417	0.784264
RF7	108.871	99.8625	123.237	120.434	123.416	123.154	128.898	124.918		RF7	0.607058	0.590513	0.569324	0.575935	0.734448	0.789155	0.742344	0.766323
RF8	66.5274	63.0595	90.0516	86.7442	82.6179	75.6278	93.4304	89.4231		RF8	0.272332	0.272446	0.359241	0.348315	0.338007	0.329966	0.396853	0.385466
RF9	86.4821	84.9518	75.7085	74.1278	73.3404	71.9901	78.0886	77.8799		RF9	0.372607	0.359418	0.336328	0.323197	0.321178	0.326989	0.359603	0.355791
	Vulcan CO2										Composite CH4
	ER2	ER5	GF2	GF5	HR2	HR5	NA2	NA5			ER2	ER5	GF2	GF5	HR2	HR5	NA2	NA5
RF1	148.205	149.07	135.365	136.987	102.918	103.325	96.8842	96.4343		RF1	0.852754	0.878838	0.795323	0.77931	0.577325	0.550463	0.503164	0.503043
RF2	168.709	166.168	184.832	188.932	199.236	203.877	188.817	183.143		RF2	0.692917	0.690897	0.778884	0.774525	0.821581	0.823516	0.779226	0.743681
RF3	106.93	104.829	84.6551	83.949	109.699	106.31	92.4231	90.28		RF3	0.572085	0.565981	0.470452	0.453978	0.598795	0.575979	0.520707	0.497543
RF4	101.516	101.468	84.7796	89.3617	102.47	95.8012	129.914	123.446		RF4	0.555914	0.565081	0.460552	0.47768	0.538406	0.500919	0.649153	0.648567
RF5	139.077	140.158	114.825	111	167.921	158.985	165.663	164.314		RF5	1.03891	0.991878	0.999429	0.97856	1.22266	1.14048	1.19118	1.18234
RF6	177.798	168.482	175.029	169.842	143.953	136.934	200.381	194.581		RF6	0.828421	0.889877	0.91923	0.864251	0.736218	0.724457	1.07453	1.06254
RF7	104.822	100.509	118.972	116.63	117.671	122.864	122.354	118.554		RF7	0.615281	0.615994	0.828576	0.796757	0.813529	0.816891	0.820638	0.856576
RF8	65.8425	63.2736	89.854	88.8489	82.2353	79.1645	96.6174	90.631		RF8	0.31707	0.31212	0.381407	0.369621	0.325708	0.325499	0.46022	0.396238
RF9	88.4879	86.6725	69.5057	68.8275	67.917	70.4629	76.7906	76.6786		RF9	0.463051	0.410374	0.411496	0.351286	0.348696	0.369281	0.427427	0.423596
											GEPA CH4
											ER2	ER5	GF2	GF5	HR2	HR5	NA2	NA5
										RF1	0.613498	0.60828	0.609283	0.588744	0.42585	0.412273	0.375558	0.37421
										RF2	0.532114	0.522513	0.638639	0.632142	0.730518	0.7201	0.658548	0.647022
										RF3	0.497981	0.481208	0.402902	0.383172	0.493435	0.483064	0.43826	0.423922
										RF4	0.448673	0.425997	0.382898	0.37405	0.430709	0.36758	0.58147	0.571849
										RF5	0.745747	0.702459	0.629695	0.607813	0.760127	0.665589	0.808277	0.785217
										RF6	0.667181	0.651729	0.621485	0.60738	0.565586	0.546106	0.729802	0.727362
										RF7	0.549874	0.545483	0.650645	0.640695	0.700251	0.680434	0.724778	0.740338
										RF8	0.254519	0.257094	0.337866	0.329607	0.31934	0.328948	0.352434	0.344103
										RF9	0.360544	0.340834	0.323116	0.30477	0.278339	0.270311	0.334574	0.347095
	CO2 summary stats										CH4 summary stats
	Prior totals:										Prior totals:
	ACES	116.21									EDGAR v4.2	1.26973
	EDGAR v5.0	87.3244									EDGAR v5.0	0.260948
	Vulcan	104.524									Composite	0.76432
											GEPA	0.258912
	Posterior totals:										Posterior totals:
	Overall	125.218									Overall	0.615592
		Flight avg			Prior avg			Model avg				Flight avg			Prior avg			Model avg
	RF1	125.554		ACES	136.391		ER2	125.189			RF1	0.637281		EDGAR v4.2	0.7433		ER2	0.607966
	RF2	191.396		EDGAR v5.0	117.405		ER5	122.609			RF2	0.739182		EDGAR v5.0	0.528603		ER5	0.601811
	RF3	97.8587		Vulcan	121.859		GF2	122.188			RF3	0.501237		Composite	0.670827		GF2	0.610315
	RF4	103.367					GF5	121.468			RF4	0.528999		GEPA	0.519639		GF5	0.593845
	RF5	145.962		Sdev	9.92851		HR2	124.088			RF5	0.887549					HR2	0.614986
	RF6	176.104		Rel Sdev	7.92896	%	HR5	121.507			RF6	0.794597		Sdev	0.109749		HR5	0.597136
	RF7	121.926					NA2	134.431			RF7	0.725677		Rel Sdev	17.8282	%	NA2	0.653188
	RF8	85.126					NA5	130.266			RF8	0.3519					NA5	0.64549
	RF9	79.6709									RF9	0.373908
							Sdev	4.71248									Sdev	0.0220298
	Sdev	39.2398					Rel Sdev	3.76341	%		Sdev	0.187879					Rel Sdev	3.57864	%
	Rel Sdev	31.3371	%								Rel Sdev	30.52	%

## Sheet: B1
	ACES CO2										EDGAR v4.2 CH4
	ER2	ER5	GF2	GF5	HR2	HR5	NA2	NA5			ER2	ER5	GF2	GF5	HR2	HR5	NA2	NA5
RF1	173.773	174.697	165.1	166.003	120.387	120.724	112.721	111.555		RF1	1.02239	1.05826	1.15313	1.16008	0.782116	0.728999	0.637771	0.649936
RF2	197.232	192.896	210.892	224.839	228.07	229.592	218.041	198.872		RF2	0.903738	0.891803	0.947154	0.979235	0.983965	0.932644	0.895246	0.828819
RF3	111.007	111.085	92.4739	91.5162	115.548	115.575	101.34	99.7433		RF3	0.574108	0.566625	0.495686	0.475751	0.62409	0.629706	0.537149	0.51146
RF4	102.284	103.235	101.046	105.968	105.228	95.0496	144.229	140.522		RF4	0.639639	0.671981	0.57741	0.598893	0.666293	0.644952	0.809395	0.822316
RF5	151.217	154.988	127.595	122.808	182.918	179.166	183.983	177.984		RF5	1.04827	1.03743	0.972409	0.979056	1.39662	1.29371	1.23415	1.2403
RF6	194.158	183.071	196.112	191.482	153.975	151.671	223.448	213.394		RF6	0.952072	0.945653	1.02358	0.948736	0.838952	0.845157	1.14746	1.15736
RF7	113.868	113.859	133.565	132.94	132.273	135.04	138.498	139.707		RF7	0.604627	0.615581	0.865445	0.843625	0.924818	0.915968	0.811799	0.859949
RF8	76.3299	73.5483	98.4834	96.8282	90.9424	86.3966	107.288	102.55		RF8	0.387103	0.375316	0.400951	0.412928	0.359855	0.347186	0.468927	0.461932
RF9	91.3201	89.4794	77.8663	77.0633	80.6105	78.9041	86.2997	85.5961		RF9	0.458056	0.456728	0.393968	0.389709	0.37488	0.373018	0.440192	0.433977
	EDGAR v5.0 CO2										EDGAR v5.0 CH4
	ER2	ER5	GF2	GF5	HR2	HR5	NA2	NA5			ER2	ER5	GF2	GF5	HR2	HR5	NA2	NA5
RF1	140.662	140.937	133.977	135.049	92.2007	92.5608	87.4188	87.4452		RF1	0.658472	0.655229	0.681829	0.675451	0.41587	0.397791	0.390227	0.387638
RF2	150.407	148.857	177.344	180.022	198.228	197.914	184.487	175.761		RF2	0.577342	0.577728	0.649927	0.655455	0.775025	0.763142	0.683864	0.66316
RF3	98.5705	97.2958	79.0758	78.2274	104.173	103.195	86.8577	84.5412		RF3	0.535843	0.507706	0.427174	0.410143	0.553592	0.540373	0.44982	0.425416
RF4	90.7251	90.6087	84.7313	84.4964	91.9331	86.9422	121.692	118.623		RF4	0.452164	0.436002	0.389966	0.384789	0.430867	0.396586	0.543052	0.540998
RF5	130.525	124.118	107.571	105.239	148.469	135.688	158.383	155.855		RF5	0.626907	0.607221	0.494628	0.513903	0.676882	0.62865	0.694299	0.698332
RF6	178.61	166.617	177.246	174.362	133.527	131.635	203.026	199.851		RF6	0.725393	0.679775	0.695108	0.634852	0.641603	0.62508	0.773217	0.780237
RF7	101.92	100.174	118.68	116.409	123.022	123.08	129.02	126.814		RF7	0.589721	0.577179	0.602778	0.607115	0.746096	0.790834	0.759152	0.781509
RF8	63.341	61.5223	85.5554	83.4677	76.406	73.176	92.4777	88.983		RF8	0.280966	0.281958	0.366829	0.359078	0.337343	0.318094	0.41104	0.397786
RF9	87.2059	86.5921	74.0928	74.5263	75.342	73.9948	79.4803	79.0314		RF9	0.398249	0.389589	0.335108	0.33002	0.345243	0.339462	0.366951	0.362881
	Vulcan CO2										Composite CH4
	ER2	ER5	GF2	GF5	HR2	HR5	NA2	NA5			ER2	ER5	GF2	GF5	HR2	HR5	NA2	NA5
RF1	148.316	148.236	139.377	142.271	103.023	103.485	95.015	94.6005		RF1	0.85311	0.880195	0.892737	0.870899	0.578177	0.548148	0.489435	0.493415
RF2	171.06	168.11	182.731	189.477	200.673	203.562	187.938	180.995		RF2	0.740188	0.72961	0.750323	0.79346	0.863578	0.837065	0.768659	0.725208
RF3	106.006	104.296	86.5617	85.1434	110.519	108.823	92.523	90.5626		RF3	0.568206	0.560811	0.477177	0.466097	0.614162	0.61492	0.522339	0.506408
RF4	98.4433	98.5671	92.6089	96.107	101.102	94.0915	133.538	130.493		RF4	0.539564	0.562202	0.480635	0.496782	0.524994	0.487647	0.671743	0.676855
RF5	139.33	140.269	115.635	111.117	166.01	158.341	168.537	165.771		RF5	1.04802	1.00494	0.967135	0.97145	1.28488	1.18547	1.19461	1.19324
RF6	181.035	169.156	176.58	169.935	143.252	140.983	199.874	194.053		RF6	0.88351	0.892182	0.918366	0.855209	0.759926	0.763685	1.04544	1.04294
RF7	103.356	96.9715	115.754	113.421	115.68	122.245	122.295	121.31		RF7	0.598553	0.604413	0.824296	0.810364	0.884473	0.873004	0.836968	0.864317
RF8	63.7982	62.6153	88.4225	86.715	81.1517	78.1916	95.1193	90.4668		RF8	0.352188	0.34762	0.363029	0.369982	0.322733	0.315307	0.437726	0.421676
RF9	85.8608	84.5593	71.952	71.5205	75.6571	74.1714	79.0893	78.5393		RF9	0.467505	0.461226	0.397091	0.395273	0.399698	0.395409	0.43768	0.43124
											GEPA CH4
											ER2	ER5	GF2	GF5	HR2	HR5	NA2	NA5
										RF1	0.614513	0.607865	0.642467	0.621105	0.429853	0.41143	0.369463	0.366371
										RF2	0.550138	0.544832	0.615761	0.628349	0.753153	0.73955	0.658005	0.639735
										RF3	0.49094	0.482195	0.404346	0.39292	0.512387	0.50887	0.437118	0.42741
										RF4	0.434464	0.430648	0.400859	0.38962	0.419159	0.372082	0.578551	0.572794
										RF5	0.760399	0.716774	0.611993	0.591156	0.794978	0.688798	0.814288	0.797252
										RF6	0.674025	0.672744	0.634157	0.609339	0.603401	0.588976	0.721444	0.716863
										RF7	0.547745	0.543562	0.654025	0.641079	0.728994	0.718541	0.730002	0.743937
										RF8	0.273758	0.275803	0.334976	0.330868	0.316394	0.317331	0.383759	0.370247
										RF9	0.373036	0.364441	0.313945	0.308838	0.321746	0.31454	0.347488	0.344254
	CO2 summary stats										CH4 summary stats
	Prior totals:										Prior totals:
	ACES	116.21									EDGAR v4.2	1.26973
	EDGAR v5.0	87.3244									EDGAR v5.0	0.260948
	Vulcan	104.524									Composite	0.76432
											GEPA	0.258912
	Posterior totals:										Posterior totals:
	Overall	125.303									Overall	0.626015
		Flight avg			Prior avg			Model avg				Flight avg			Prior avg			Model avg
	RF1	126.231		ACES	136.229		ER2	124.087			RF1	0.660137		EDGAR v4.2	0.756086		ER2	0.616803
	RF2	191.583		EDGAR v5.0	117.361		ER5	121.717			RF2	0.751433		EDGAR v5.0	0.536163		ER5	0.611495
	RF3	98.1108		Vulcan	122.319		GF2	122.631			RF3	0.507842		Composite	0.683438		GF2	0.615455
	RF4	104.678					GF5	122.48			RF4	0.532622		GEPA	0.528373		GF5	0.608378
	RF5	146.313		Sdev	9.78134		HR2	124.086			RF5	0.899005					HR2	0.638522
	RF6	176.961		Rel Sdev	7.80615	%	HR5	122.007			RF6	0.806139		Sdev	0.112284		HR5	0.616448
	RF7	120.413					NA2	134.541			RF7	0.73439		Rel Sdev	17.9364	%	NA2	0.652734
	RF8	83.4907					NA5	130.875			RF8	0.359397					NA5	0.648283
	RF9	79.9481									RF9	0.38317
							Sdev	4.75373									Sdev	0.017631
	Sdev	39.5252					Rel Sdev	3.79379	%		Sdev	0.189853					Rel Sdev	2.81638	%
	Rel Sdev	31.5437	%								Rel Sdev	30.3272	%

## Sheet: B2
	ACES CO2										EDGAR v4.2 CH4
	ER2	ER5	GF2	GF5	HR2	HR5	NA2	NA5			ER2	ER5	GF2	GF5	HR2	HR5	NA2	NA5
RF1	174.403	176.094	159.176	159.41	120.567	120.694	114.865	113.298		RF1	1.02369	1.06037	0.978808	0.952165	0.901235	0.738256	0.667703	0.659242
RF2	195.572	191.59	210.98	227.848	228.008	230.96	221.167	202.581		RF2	0.874865	0.857827	0.963787	1.02528	0.949307	0.917238	0.918026	0.867283
RF3	124.149	121.435	102.25	99.7336	132.621	128.435	111.74	109.617		RF3	0.62975	0.610452	0.536908	0.503953	0.674241	0.660482	0.577818	0.542187
RF4	104.891	107.164	97.3171	101.339	106.694	97.8033	139.036	135.081		RF4	0.878981	0.878887	0.823684	0.801299	0.896719	0.853485	0.983095	0.970617
RF5	152.1	156.692	125.986	121.915	183.663	180.147	181.337	175.122		RF5	1.05811	1.04899	1.01953	1.06275	1.33991	1.22004	1.24384	1.24852
RF6	193.334	181.736	197.248	191.691	151.67	147.022	227.709	213.976		RF6	1.02664	0.9568	1.03085	0.9723	0.834943	0.811917	1.20311	1.19862
RF7	115.726	114.634	135.458	134.829	135.897	138.026	136.012	136.691		RF7	0.723342	0.714129	0.991115	0.961549	0.966587	0.93832	0.888945	0.91687
RF8	79.5945	76.0225	106.756	101.977	106.863	100.601	110.881	106.036		RF8	0.65005	0.612082	0.755262	0.758996	0.826293	0.776993	0.867107	0.853714
RF9	135.099	132.385	112.678	113.191	118.283	116.102	121.139	119.796		RF9	0.96081	0.93242	0.821985	0.818349	0.801207	0.771464	0.845604	0.831753
	EDGAR v5.0 CO2										EDGAR v5.0 CH4
	ER2	ER5	GF2	GF5	HR2	HR5	NA2	NA5			ER2	ER5	GF2	GF5	HR2	HR5	NA2	NA5
RF1	141.02	142.274	129.663	129.814	92.5568	92.7813	88.6663	88.6499		RF1	0.65508	0.652073	0.64461	0.639047	0.42299	0.40634	0.399394	0.400469
RF2	148.614	147.169	176.734	181.209	196.778	198.278	186.382	178.628		RF2	0.576694	0.582413	0.689164	0.718217	0.779207	0.768948	0.703207	0.683037
RF3	105.656	102.659	84.0424	82.2032	112.912	109.008	91.7351	88.9964		RF3	0.549162	0.521023	0.434387	0.414053	0.553175	0.535046	0.455501	0.427345
RF4	92.7594	93.6028	81.7221	81.1285	91.481	87.4173	117.966	114.903		RF4	0.469275	0.454621	0.396087	0.385923	0.440679	0.40717	0.546002	0.540603
RF5	131.024	124.551	106.571	104.326	149.064	136.533	156.417	153.925		RF5	0.623434	0.596838	0.50296	0.515413	0.68031	0.623086	0.684753	0.682623
RF6	181.211	168.543	180.48	176.165	134.351	130.631	207.443	205.093		RF6	0.723178	0.672781	0.710772	0.64698	0.61606	0.5857	0.782371	0.782077
RF7	103.76	100.963	120.096	117.218	123.997	124.124	127.42	124.854		RF7	0.655222	0.628547	0.687545	0.679692	0.810182	0.842589	0.794836	0.817351
RF8	68.3075	65.7038	95.2871	91.2473	91.8472	87.7736	99.7893	96.5278		RF8	0.275681	0.277023	0.369651	0.356739	0.36675	0.333328	0.398401	0.386363
RF9	101.225	100.007	84.8327	86.056	88.0384	86.3861	88.6997	88.1534		RF9	0.449029	0.435686	0.392117	0.385483	0.389309	0.382064	0.402483	0.400011
	Vulcan CO2										Composite CH4
	ER2	ER5	GF2	GF5	HR2	HR5	NA2	NA5			ER2	ER5	GF2	GF5	HR2	HR5	NA2	NA5
RF1	148.618	149.132	135.326	137.239	103.086	103.27	96.7005	95.901		RF1	0.854778	0.88251	0.811744	0.784729	0.67231	0.566918	0.511053	0.510785
RF2	169.28	166.693	182.861	191.143	199.703	204.695	189.62	183.537		RF2	0.717897	0.706995	0.78057	0.852128	0.839794	0.819705	0.779326	0.742869
RF3	116.267	112.158	93.9638	91.1829	124.336	119.101	100.181	97.8345		RF3	0.599244	0.587683	0.498156	0.476277	0.629744	0.616166	0.538142	0.516131
RF4	100.294	102.171	87.6916	90.831	100.289	94.4427	128.443	124.812		RF4	0.687832	0.68647	0.622127	0.604448	0.669561	0.622884	0.774734	0.761782
RF5	139.434	141.663	114.251	110.555	167.147	159.393	166.225	162.972		RF5	1.04843	1.0082	1.01117	1.02589	1.23957	1.13009	1.1961	1.19053
RF6	183.703	169.781	176.538	169.565	142.807	139.268	204.944	196.128		RF6	0.926044	0.891036	0.931051	0.874221	0.749369	0.724525	1.09506	1.07947
RF7	104.87	97.0275	116.77	114.44	117.649	123.084	120.274	119.108		RF7	0.664131	0.653035	0.902182	0.87803	0.900406	0.869475	0.862678	0.881596
RF8	68.8735	66.4185	97.1088	93.23	97.433	91.0308	100.217	95.1756		RF8	0.488862	0.468807	0.553909	0.553752	0.578819	0.545983	0.616434	0.605949
RF9	116.864	115.096	96.7675	97.8794	102.903	101.415	103.18	102.594		RF9	0.73269	0.711333	0.63652	0.631884	0.623761	0.606596	0.647094	0.637404
											GEPA CH4
											ER2	ER5	GF2	GF5	HR2	HR5	NA2	NA5
										RF1	0.61384	0.60786	0.608594	0.590083	0.4341	0.416816	0.377572	0.378135
										RF2	0.533773	0.537399	0.638085	0.681528	0.739695	0.72459	0.659723	0.642819
										RF3	0.510627	0.506126	0.417074	0.400343	0.511675	0.502477	0.447091	0.43607
										RF4	0.472775	0.463407	0.420128	0.403313	0.449473	0.398559	0.591729	0.580267
										RF5	0.753049	0.711949	0.64227	0.612652	0.764608	0.663479	0.806484	0.784553
										RF6	0.668226	0.649846	0.632101	0.606409	0.579435	0.544883	0.730906	0.723604
										RF7	0.575931	0.563131	0.68526	0.669446	0.740558	0.718156	0.739034	0.751066
										RF8	0.260704	0.262543	0.343547	0.339597	0.354587	0.345629	0.364376	0.356701
										RF9	0.438864	0.425247	0.389485	0.380041	0.381406	0.37265	0.400832	0.398464
	CO2 summary stats										CH4 summary stats
	Prior totals:										Prior totals:
	ACES	116.21									EDGAR v4.2	1.26973
	EDGAR v5.0	87.3244									EDGAR v5.0	0.260948
	Vulcan	104.524									Composite	0.76432
											GEPA	0.258912
	Posterior totals:										Posterior totals:
	Overall	129.922									Overall	0.68042
		Flight avg			Prior avg			Model avg				Flight avg			Prior avg			Model avg
	RF1	125.55		ACES	142.396		ER2	129.505			RF1	0.650728		EDGAR v4.2	0.881103		ER2	0.676408
	RF2	192.085		EDGAR v5.0	120.362		ER5	126.791			RF2	0.758481		EDGAR v5.0	0.549949		ER5	0.66157
	RF3	106.759		Vulcan	127.008		GF2	126.243			RF3	0.525578		Composite	0.751355		GF2	0.674255
	RF4	103.303					GF5	125.828			RF4	0.623019		GEPA	0.53927		GF5	0.665638
	RF5	145.875		Sdev	11.3026		HR2	130.394			RF5	0.898129					HR2	0.697444
	RF6	177.96		Rel Sdev	8.69955	%	HR5	127.719			RF6	0.81129		Sdev	0.165581		HR5	0.660057
	RF7	120.955					NA2	138.451			RF7	0.783467		Rel Sdev	24.3352	%	NA2	0.708349
	RF8	91.4459					NA5	134.444			RF8	0.49702					NA5	0.699636
	RF9	105.365									RF9	0.576064
							Sdev	4.44881									Sdev	0.0188288
	Sdev	35.097					Rel Sdev	3.42421	%		Sdev	0.138706					Rel Sdev	2.76724	%
	Rel Sdev	27.0138	%								Rel Sdev	20.3854	%

## Sheet: B3
	ACES CO2										EDGAR v4.2 CH4
	ER2	ER5	GF2	GF5	HR2	HR5	NA2	NA5			ER2	ER5	GF2	GF5	HR2	HR5	NA2	NA5
RF1	172.7	176.025	152.355	155.739	116.872	116.301	112.859	111.556		RF1	1.01984	1.05213	0.890157	0.891476	0.714664	0.681904	0.65717	0.653238
RF2	184.868	180.178	185.453	197.285	213.689	213.908	196.157	189.301		RF2	0.758927	0.772116	0.853672	0.785929	0.841321	0.839722	0.868663	0.779544
RF3	106.653	110.912	85.3586	85.6813	105.148	106.447	92.6888	91.8632		RF3	0.536076	0.548035	0.415099	0.397225	0.499483	0.493929	0.467149	0.437198
RF4	97.6078	96.4406	91.8833	97.7649	69.8175	66.941	129.949	127.742		RF4	0.658227	0.680915	0.54736	0.575475	0.69849	0.671799	0.770311	0.776295
RF5	151.158	150.011	125.747	121.73	184.094	178.567	179.94	168.983		RF5	1.03857	1.01462	0.998491	0.997161	1.306	1.19507	1.16835	1.13644
RF6	167.717	146.012	166.846	167.536	129.886	118.855	192.623	183.602		RF6	0.852673	0.718423	0.805399	0.775429	0.56697	0.521105	0.93709	0.982173
RF7	114.888	115.054	130.874	127.208	108.059	114.428	133.088	133.647		RF7	0.52549	0.524131	0.707393	0.730297	0.593581	0.560676	0.645246	0.753451
RF8	59.1674	56.9705	81.3363	81.9132	75.0248	75.0397	81.3872	77.5226		RF8	0.308154	0.300259	0.359296	0.377186	0.346245	0.342347	0.397021	0.40725
RF9	72.5837	70.0841	70.9515	70.9047	67.2277	65.3204	73.4025	72.6542		RF9	0.412201	0.398608	0.398745	0.379784	0.32229	0.317906	0.390152	0.404659
	EDGAR v5.0 CO2										EDGAR v5.0 CH4
	ER2	ER5	GF2	GF5	HR2	HR5	NA2	NA5			ER2	ER5	GF2	GF5	HR2	HR5	NA2	NA5
RF1	139.576	142.109	127.456	127.017	88.0072	89.2956	86.1597	86.9283		RF1	0.651553	0.647112	0.617733	0.628579	0.408199	0.400348	0.394157	0.386843
RF2	144.467	141.952	162.848	160.295	182.259	189.04	174.836	166.604		RF2	0.5398	0.513444	0.596172	0.583721	0.654467	0.667524	0.626219	0.612789
RF3	96.6674	95.4147	72.658	72.0257	92.4904	93.1286	81.0283	77.5303		RF3	0.493013	0.469509	0.365996	0.355664	0.473656	0.437943	0.383283	0.375116
RF4	84.9618	79.3272	77.3762	78.0183	77.8445	67.8841	112.29	107.983		RF4	0.430517	0.404099	0.361693	0.360883	0.355474	0.3292	0.50928	0.507143
RF5	130.367	120.047	106.34	104.396	148.72	76.2986	155.789	148.634		RF5	0.578463	0.560769	0.478945	0.488769	0.191054	-0.0744835	0.650046	0.638505
RF6	148.842	153.158	177.975	159.368	119.846	124.555	192.358	177.118		RF6	0.540651	0.503564	0.572546	0.522578	0.429961	0.427718	0.63353	0.764888
RF7	104.165	101.265	117.444	116.24	103.877	90.8899	120.374	122.989		RF7	0.474831	0.453053	0.466817	0.455834	0.365586	0.383199	0.550196	0.589099
RF8	50.2569	49.7087	71.5926	69.9316	65.2704	63.6991	73.9409	70.6889		RF8	0.226892	0.226566	0.303425	0.301557	0.304087	0.276978	0.345569	0.315007
RF9	58.4037	56.9533	52.0521	53.9766	54.3719	52.073	55.5532	51.8882		RF9	0.309918	0.312193	0.243034	0.202162	0.250925	0.252614	0.284549	0.285844
	Vulcan CO2										Composite CH4
	ER2	ER5	GF2	GF5	HR2	HR5	NA2	NA5			ER2	ER5	GF2	GF5	HR2	HR5	NA2	NA5
RF1	147.002	149.097	129.286	133.381	99.2742	99.5673	94.7555	94.2976		RF1	0.850787	0.877573	0.74449	0.749037	0.549744	0.536857	0.506501	0.505896
RF2	161.206	160.676	165.411	170.768	192.1	188.493	175.248	176.551		RF2	0.629505	0.646686	0.657666	0.653697	0.754832	0.726129	0.681451	0.659343
RF3	100.316	101.835	80.9271	79.9593	100.021	99.559	84.1469	83.3226		RF3	0.526742	0.510926	0.388778	0.377141	0.473451	0.462488	0.441056	0.428918
RF4	93.6746	91.6068	82.8089	87.5617	78.6373	76.1647	122.192	118.169		RF4	0.541829	0.559722	0.454046	0.475009	0.528905	0.487289	0.638366	0.637232
RF5	139.099	139.867	114.159	110.553	161.621	150.882	164.938	156.489		RF5	1.00719	0.912267	0.977718	0.983554	0.71947	0.53728	1.10379	1.16148
RF6	151.308	144.344	150.798	141.663	136.797	119.192	169.18	175.595		RF6	0.7906	0.664889	0.744722	0.685381	0.494528	0.568326	0.936809	0.980511
RF7	104.306	97.5248	114.571	110.545	103.222	100.763	114.25	121.542		RF7	0.476292	0.447785	0.636929	0.637366	0.560309	0.628469	0.694019	0.693676
RF8	54.1992	52.2101	74.0926	72.416	68.5581	68.9673	74.5626	69.1534		RF8	0.289024	0.283543	0.330601	0.340567	0.316545	0.319462	0.360138	0.35611
RF9	68.5718	66.1628	58.6851	60.324	59.8901	58.5004	61.405	61.2808		RF9	0.361511	0.350428	0.33218	0.325148	0.300795	0.286771	0.318799	0.343117
											GEPA CH4
											ER2	ER5	GF2	GF5	HR2	HR5	NA2	NA5
										RF1	0.61004	0.602941	0.576372	0.577508	0.415282	0.408189	0.377389	0.365686
										RF2	0.489107	0.489942	0.563958	0.523382	0.645604	0.633974	0.567704	0.586513
										RF3	0.444756	0.44515	0.342876	0.329037	0.404252	0.410222	0.38464	0.395564
										RF4	0.414601	0.419895	0.383427	0.375237	0.371261	0.313822	0.550176	0.542317
										RF5	0.733842	0.612974	0.620314	0.587971	-0.0163616	0.0282441	0.769738	0.749373
										RF6	0.560404	0.561271	0.455287	0.452783	0.355911	0.424759	0.642402	0.735184
										RF7	0.457555	0.461515	0.506595	0.544355	0.542428	0.3639	0.57741	0.582248
										RF8	0.225112	0.220643	0.296341	0.293201	0.279055	0.285378	0.33279	0.314091
										RF9	0.274759	0.278061	0.217288	0.178901	0.235994	0.228077	0.242848	0.251302
	CO2 summary stats										CH4 summary stats
	Prior totals:										Prior totals:
	ACES	116.21									EDGAR v4.2	1.26973
	EDGAR v5.0	87.3244									EDGAR v5.0	0.260948
	Vulcan	104.524									Composite	0.76432
											GEPA	0.258912
	Posterior totals:										Posterior totals:
	Overall	113.83									Overall	0.531678
		Flight avg			Prior avg			Model avg				Flight avg			Prior avg			Model avg
	RF1	122.817		ACES	123.614		ER2	114.99			RF1	0.623419		EDGAR v4.2	0.668748		ER2	0.556652
	RF2	178.066		EDGAR v5.0	106.207		ER5	112.776			RF2	0.66261		EDGAR v5.0	0.439286		ER5	0.54016
	RF3	91.4909		Vulcan	111.669		GF2	112.122			RF3	0.434824		Composite	0.582225		GF2	0.533655
	RF4	92.2769					GF5	111.637			RF4	0.510322		GEPA	0.436455		GF5	0.524972
	RF5	141.185		Sdev	8.90223		HR2	111.208			RF5	0.745488					HR2	0.47929
	RF6	154.799		Rel Sdev	7.82063	%	HR5	106.102			RF6	0.644015		Sdev	0.11394		HR5	0.454865
	RF7	113.384					NA2	122.411			RF7	0.549679		Rel Sdev	21.4303	%	NA2	0.577889
	RF8	68.2338					NA5	119.394			RF8	0.311889					NA5	0.585945
	RF9	62.2175									RF9	0.302861
							Sdev	5.09019									Sdev	0.0454653
	Sdev	39.2754					Rel Sdev	4.47175	%		Sdev	0.156012					Rel Sdev	8.55127	%
	Rel Sdev	34.5035	%								Rel Sdev	29.3434	%

## Sheet: B4
	ACES CO2										EDGAR v4.2 CH4
	ER2	ER5	GF2	GF5	HR2	HR5	NA2	NA5			ER2	ER5	GF2	GF5	HR2	HR5	NA2	NA5
RF1	174.226	176.53	160.154	160.175	120.446	120.639	115.056	113.839		RF1	1.01854	1.0562	0.957556	0.943955	0.737896	0.700184	0.657152	0.654335
RF2	194.742	191.313	212.488	222.797	227.497	231.212	220.337	202.734		RF2	0.818647	0.827969	0.959305	0.964821	0.910381	0.904488	0.904764	0.861485
RF3	113.501	113.242	93.2256	91.4115	116.146	114.844	102.692	101.59		RF3	0.586131	0.577685	0.495103	0.46923	0.597393	0.623286	0.528305	0.510395
RF4	106.762	107.627	93.7893	99.3462	108.073	96.9954	140.565	134.869		RF4	0.666366	0.696393	0.550628	0.574049	0.694746	0.680301	0.769268	0.778022
RF5	152.216	155.74	126.329	121.586	183.728	179.465	180.453	174.841		RF5	1.04553	1.02513	1.00063	0.995154	1.31254	1.21125	1.23182	1.236
RF6	195.785	183.247	195.955	192.013	151.279	148.231	227.211	215.611		RF6	0.904875	0.941117	1.02301	0.937154	0.806942	0.770231	1.19669	1.16549
RF7	116.058	118.131	138.244	136.367	134.188	135.709	139.181	138.945		RF7	0.64199	0.635385	0.888899	0.857091	0.862048	0.869824	0.828829	0.864729
RF8	76.4364	72.7953	98.2122	97.6982	96.1406	87.5862	107.05	101.754		RF8	0.359723	0.35131	0.392605	0.40119	0.3659	0.362591	0.450567	0.443642
RF9	105.443	102.651	88.9164	84.612	83.5117	81.4512	95.2358	90.6215		RF9	0.43316	0.418722	0.42143	0.417629	0.333846	0.330137	0.442457	0.437717
	EDGAR v5.0 CO2										EDGAR v5.0 CH4
	ER2	ER5	GF2	GF5	HR2	HR5	NA2	NA5			ER2	ER5	GF2	GF5	HR2	HR5	NA2	NA5
RF1	140.857	142.502	130.512	130.605	92.4695	92.5819	88.7256	89.0281		RF1	0.65433	0.654274	0.649312	0.642767	0.420824	0.404344	0.398127	0.39622
RF2	149.474	148.367	178.08	179.799	197.471	199.22	186.676	179.359		RF2	0.563013	0.562204	0.674377	0.676382	0.760837	0.75221	0.689193	0.671904
RF3	99.2253	98.0277	79.0895	78.206	103.143	101.958	86.4841	84.564		RF3	0.542443	0.511309	0.425378	0.399231	0.543423	0.527305	0.443684	0.416665
RF4	93.2689	93.1322	78.874	79.3434	91.1188	87.3676	118.213	115.341		RF4	0.461301	0.436341	0.367648	0.369504	0.430188	0.387941	0.537032	0.53274
RF5	130.549	124.091	106.925	104.55	149.08	136.227	156.751	154.326		RF5	0.622613	0.594518	0.500026	0.511942	0.667843	0.619185	0.681765	0.682211
RF6	181.254	167.638	178.934	176.363	131.989	129.579	206.593	204.021		RF6	0.719023	0.677493	0.705883	0.637323	0.61541	0.593067	0.789042	0.791823
RF7	108.217	101.722	123.168	120.139	124.136	123.681	129.215	126.906		RF7	0.606739	0.590503	0.588494	0.592809	0.732926	0.78212	0.750547	0.770948
RF8	67.254	63.9179	89.3646	86.9484	81.4105	76.2697	94.6905	91.0186		RF8	0.274068	0.274184	0.358133	0.347665	0.340513	0.328251	0.399621	0.387318
RF9	88.9522	87.2688	77.7407	76.5496	75.7164	74.2723	80.6005	80.1765		RF9	0.382766	0.370707	0.338351	0.330668	0.332079	0.33434	0.363969	0.359831
	Vulcan CO2										Composite CH4
	ER2	ER5	GF2	GF5	HR2	HR5	NA2	NA5			ER2	ER5	GF2	GF5	HR2	HR5	NA2	NA5
RF1	148.455	149.452	135.972	137.584	103.068	103.223	96.742	96.2932		RF1	0.852725	0.87984	0.799688	0.781899	0.57394	0.548999	0.505309	0.504862
RF2	169.34	166.848	184.353	189.549	200.015	204.671	189.496	183.829		RF2	0.698869	0.691076	0.77075	0.794873	0.824734	0.82149	0.778757	0.740887
RF3	107.363	105.211	85.7617	84.3042	110.146	107.092	92.7142	90.5102		RF3	0.578907	0.571264	0.472748	0.455969	0.597919	0.586507	0.517326	0.498366
RF4	100.808	101.959	84.6071	89.205	101.273	95.0239	129.278	123.319		RF4	0.554866	0.569016	0.457818	0.475422	0.537203	0.504223	0.648926	0.65027
RF5	139.043	140.308	114.479	110.703	167.443	158.869	165.415	163.561		RF5	1.0383	0.992285	0.998049	0.9831	1.22483	1.13739	1.18969	1.18078
RF6	181.48	169.351	175.137	169.359	143.823	137.958	201.604	195.33		RF6	0.846905	0.894385	0.920161	0.868433	0.737314	0.724855	1.09086	1.07229
RF7	105.39	100.628	118.798	116.744	117.992	122.712	122.788	120.59		RF7	0.61647	0.612013	0.822389	0.799268	0.819129	0.82031	0.825723	0.855522
RF8	66.6893	64.0403	89.6576	87.7252	82.1722	79.3618	97.2307	91.497		RF8	0.328493	0.32175	0.368858	0.363759	0.330854	0.333731	0.452259	0.408086
RF9	92.9103	90.9643	75.3196	74.59	74.0722	75.5735	82.4486	82.0664		RF9	0.453945	0.409602	0.406828	0.366885	0.336017	0.345552	0.41906	0.415904
											GEPA CH4
											ER2	ER5	GF2	GF5	HR2	HR5	NA2	NA5
										RF1	0.614475	0.609795	0.612858	0.592154	0.430595	0.413333	0.37722	0.374217
										RF2	0.533881	0.524405	0.632798	0.643605	0.733045	0.719514	0.658353	0.646833
										RF3	0.501016	0.485838	0.408276	0.388946	0.498993	0.488445	0.441696	0.428674
										RF4	0.446517	0.429718	0.383234	0.37485	0.430314	0.369188	0.579646	0.569863
										RF5	0.745981	0.704141	0.630128	0.607367	0.762025	0.665856	0.807765	0.783918
										RF6	0.669336	0.654548	0.619049	0.603876	0.571137	0.546969	0.730148	0.730951
										RF7	0.552756	0.545268	0.650753	0.639654	0.702502	0.687237	0.729852	0.742673
										RF8	0.257636	0.262431	0.337261	0.329402	0.32389	0.327596	0.358236	0.350007
										RF9	0.363893	0.346034	0.326264	0.31372	0.289316	0.28192	0.346464	0.347885
	CO2 summary stats										CH4 summary stats
	Prior totals:										Prior totals:
	ACES	116.21									EDGAR v4.2	1.26973
	EDGAR v5.0	87.3244									EDGAR v5.0	0.260948
	Vulcan	104.524									Composite	0.76432
											GEPA	0.258912
	Posterior totals:										Posterior totals:
	Overall	126.037									Overall	0.616336
		Flight avg			Prior avg			Model avg				Flight avg			Prior avg			Model avg
	RF1	125.797		ACES	137.354		ER2	126.137			RF1	0.63806		EDGAR v4.2	0.740138		ER2	0.609895
	RF2	192.069		EDGAR v5.0	118.073		ER5	123.582			RF2	0.74112		EDGAR v5.0	0.531238		ER5	0.602913
	RF3	98.3521		Vulcan	122.685		GF2	122.744			RF3	0.503683		Composite	0.67191		GF2	0.608741
	RF4	102.923					GF5	122.158			RF4	0.528548		GEPA	0.522057		GF5	0.595882
	RF5	145.695		Sdev	10.0681		HR2	124.724			RF5	0.88718					HR2	0.616375
	RF6	177.489		Rel Sdev	7.98818	%	HR5	122.288			RF6	0.798618		Sdev	0.107309		HR5	0.597338
	RF7	122.485					NA2	135.313			RF7	0.727669		Rel Sdev	17.4107	%	NA2	0.653337
	RF8	85.2884					NA5	131.353			RF8	0.35286					NA5	0.646207
	RF9	84.236									RF9	0.369284
							Sdev	4.81085									Sdev	0.0217781
	Sdev	38.9153					Rel Sdev	3.81701	%		Sdev	0.189035					Rel Sdev	3.53347	%
	Rel Sdev	30.876	%								Rel Sdev	30.6707	%

## Sheet: B5
	ACES CO2										EDGAR v4.2 CH4
	ER2	ER5	GF2	GF5	HR2	HR5	NA2	NA5			ER2	ER5	GF2	GF5	HR2	HR5	NA2	NA5
RF1	174.184	175.481	157.973	158.837	119.349	119.416	114.484	112.652		RF1	1.01893	1.05385	0.952044	0.934354	0.742196	0.716747	0.659944	0.657451
RF2	192.782	188.874	208.919	223.819	224.29	226.672	218.311	199.288		RF2	0.832742	0.830494	0.960268	0.994897	0.919245	0.896442	0.910149	0.836647
RF3	113.905	113.936	93.1534	92.076	116.138	115.61	103.074	101.513		RF3	0.580503	0.576331	0.474728	0.452838	0.585219	0.582816	0.521178	0.499479
RF4	103.443	104.408	95.6017	101.315	103.919	91.9472	138.075	133.804		RF4	0.678972	0.709429	0.564425	0.589302	0.707037	0.691842	0.79481	0.801972
RF5	152.086	155.966	126.438	122.096	183.917	180.139	181.172	175.346		RF5	1.04959	1.03246	1.0085	1.00634	1.3188	1.20943	1.23169	1.23113
RF6	190.12	179.434	194.368	189.855	147.693	144.457	222.718	213.338		RF6	0.891014	0.885894	0.994936	0.915346	0.749031	0.74333	1.14514	1.14829
RF7	117.273	115.22	135.822	134.957	132.699	133.002	135.741	136.423		RF7	0.628407	0.630621	0.894306	0.849058	0.854049	0.822685	0.77852	0.832387
RF8	71.2742	69.2674	95.8955	94.1057	89.081	85.8196	100.503	96.152		RF8	0.398757	0.380095	0.436319	0.443456	0.411188	0.396566	0.494684	0.483936
RF9	100.053	97.3039	87.779	86.4993	86.0641	84.0224	93.6069	93.2467		RF9	0.531477	0.516644	0.494024	0.48865	0.422036	0.415171	0.515214	0.512169
	EDGAR v5.0 CO2										EDGAR v5.0 CH4
	ER2	ER5	GF2	GF5	HR2	HR5	NA2	NA5			ER2	ER5	GF2	GF5	HR2	HR5	NA2	NA5
RF1	140.981	141.625	128.875	129.601	91.5704	91.7155	88.4467	88.2053		RF1	0.655322	0.651551	0.642873	0.637457	0.415612	0.397514	0.396866	0.393654
RF2	147.467	146.232	175.535	178.8	195.218	195.489	184.543	175.876		RF2	0.560768	0.562195	0.664341	0.675443	0.756939	0.747306	0.684152	0.66586
RF3	100.231	98.9299	79.0555	78.1256	103.641	102.154	87.3692	85.1616		RF3	0.530547	0.500072	0.412029	0.394039	0.526533	0.509164	0.43634	0.41357
RF4	90.6437	89.8851	80.0289	80.5022	88.3089	82.9382	116.35	113.193		RF4	0.455708	0.437051	0.379008	0.375367	0.421329	0.381581	0.534498	0.531386
RF5	130.796	124.447	106.852	104.628	148.896	136.353	156.867	154.366		RF5	0.620064	0.594075	0.498052	0.511148	0.663381	0.608717	0.680729	0.679134
RF6	179.226	166.859	178.185	175.424	130.221	128.465	205.139	202.307		RF6	0.707996	0.665784	0.688407	0.628494	0.606061	0.580383	0.771528	0.782209
RF7	105.386	101.749	120.35	118.289	121.962	120.409	127.582	124.986		RF7	0.602427	0.576094	0.597516	0.598904	0.706354	0.747059	0.733997	0.755691
RF8	62.4331	60.7358	86.1075	83.6288	78.0266	75.2177	91.0908	87.6687		RF8	0.262337	0.262167	0.3492	0.33741	0.334373	0.315582	0.386161	0.369139
RF9	82.1021	80.6604	72.2685	73.022	72.1124	70.4673	75.1318	74.5707		RF9	0.385336	0.372045	0.330386	0.325463	0.332985	0.323808	0.356618	0.351907
	Vulcan CO2										Composite CH4
	ER2	ER5	GF2	GF5	HR2	HR5	NA2	NA5			ER2	ER5	GF2	GF5	HR2	HR5	NA2	NA5
RF1	148.414	148.629	133.631	136.807	102.617	102.6	96.4965	95.4425		RF1	0.852895	0.879201	0.795974	0.776556	0.571178	0.549815	0.506042	0.506485
RF2	167.673	165.149	181.927	188.971	197.877	201.371	188.067	181.718		RF2	0.691288	0.685085	0.76153	0.814747	0.811426	0.800849	0.768143	0.723888
RF3	107.648	105.768	86.4671	84.986	110.096	107.93	93.1144	91.1444		RF3	0.566441	0.563512	0.447645	0.434472	0.563141	0.556049	0.497475	0.486123
RF4	98.8063	99.6099	86.1598	90.9787	98.6708	91.026	127.244	123.785		RF4	0.560511	0.582761	0.470348	0.488857	0.547283	0.509261	0.661832	0.66215
RF5	139.372	140.571	114.763	110.829	167.792	159.257	166.08	163.522		RF5	1.0409	0.995828	0.998248	0.996321	1.22871	1.12285	1.19069	1.17605
RF6	177.977	165.666	174.304	168.169	140.425	134.701	200.835	194.638		RF6	0.842889	0.852927	0.906893	0.840001	0.694962	0.684377	1.06514	1.06377
RF7	106.268	98.0794	117.506	115.072	115.382	119.025	120.288	118.791		RF7	0.594061	0.591464	0.824143	0.790624	0.801556	0.771877	0.783008	0.817487
RF8	62.4819	60.5707	85.7309	84.0879	80.4237	77.8524	90.461	84.7812		RF8	0.364099	0.356023	0.405085	0.406792	0.372578	0.364162	0.468726	0.448459
RF9	88.5427	86.277	76.5367	76.1059	76.4995	74.9855	81.1642	80.8239		RF9	0.474576	0.459019	0.432583	0.427857	0.393076	0.384144	0.446434	0.444169
											GEPA CH4
											ER2	ER5	GF2	GF5	HR2	HR5	NA2	NA5
										RF1	0.614341	0.606472	0.605866	0.589031	0.427173	0.409066	0.376668	0.371764
										RF2	0.528452	0.524012	0.623729	0.640296	0.724934	0.712334	0.653339	0.637253
										RF3	0.490256	0.481289	0.38939	0.376359	0.481744	0.473045	0.429211	0.421347
										RF4	0.439265	0.432995	0.395003	0.384116	0.419011	0.365375	0.578028	0.567171
										RF5	0.747329	0.702549	0.627111	0.602319	0.746259	0.645033	0.802032	0.776281
										RF6	0.648484	0.643908	0.626207	0.600403	0.551735	0.532244	0.728786	0.726398
										RF7	0.548088	0.534907	0.651604	0.632787	0.679407	0.656159	0.710683	0.724653
										RF8	0.250035	0.252574	0.329646	0.324081	0.316967	0.318311	0.355594	0.346765
										RF9	0.36438	0.352234	0.318347	0.313801	0.307896	0.296488	0.341423	0.34141
	CO2 summary stats										CH4 summary stats
	Prior totals:										Prior totals:
	ACES	116.21									EDGAR v4.2	1.26973
	EDGAR v5.0	87.3244									EDGAR v5.0	0.260948
	Vulcan	104.524									Composite	0.76432
											GEPA	0.258912
	Posterior totals:										Posterior totals:
	Overall	124.432									Overall	0.615358
		Flight avg			Prior avg			Model avg				Flight avg			Prior avg			Model avg
	RF1	124.918		ACES	135.67		ER2	124.132			RF1	0.636403		EDGAR v4.2	0.74887		ER2	0.611367
	RF2	189.786		EDGAR v5.0	116.273		ER5	121.531			RF2	0.737475		EDGAR v5.0	0.524239		ER5	0.603712
	RF3	98.8011		Vulcan	121.354		GF2	121.49			RF3	0.489153		Composite	0.672438		GF2	0.609742
	RF4	101.277					GF5	121.54			RF4	0.534928		GEPA	0.515884		GF5	0.599927
	RF5	145.94		Sdev	10.0579		HR2	123.07			RF5	0.88568					HR2	0.614206
	RF6	175.189		Rel Sdev	8.083	%	HR5	120.483			RF6	0.77853		Sdev	0.114428		HR5	0.589933
	RF7	120.511					NA2	133.48			RF7	0.710018		Rel Sdev	18.5954	%	NA2	0.649874
	RF8	81.3915					NA5	129.731			RF8	0.366915					NA5	0.644101
	RF9	82.0769									RF9	0.399118
							Sdev	4.67387									Sdev	0.0209983
	Sdev	38.9954					Rel Sdev	3.75616	%		Sdev	0.178499					Rel Sdev	3.41237	%
	Rel Sdev	31.3387	%								Rel Sdev	29.0074	%

## Sheet: Pb1
	ACES CO2										EDGAR v4.2 CH4
	ER2	ER5	GF2	GF5	HR2	HR5	NA2	NA5			ER2	ER5	GF2	GF5	HR2	HR5	NA2	NA5
RF1	146.734	146.628	142.659	140.644	123.81	122.322	118.007	117.046		RF1	1.04219	1.0483	0.999435	0.979288	0.937275	0.912107	0.853217	0.835652
RF2	169.206	167.409	188.202	185.261	198.836	200.078	196.893	192.638		RF2	0.91287	0.928114	0.962488	0.964052	0.984485	1.00385	0.996783	1.00684
RF3	118.709	117.328	98.5568	97.0142	118.152	114.953	103.828	102.08		RF3	0.712199	0.717619	0.572532	0.568062	0.684134	0.735066	0.602201	0.592435
RF4	119.817	118.974	97.1311	99.7267	111.607	107.676	131.524	123.956		RF4	0.7511	0.772754	0.623555	0.642471	0.761717	0.776838	0.794911	0.799368
RF5	145.9	143.007	133.642	130.812	144.026	137.808	168.528	163.468		RF5	1.11536	1.08351	1.09267	1.08541	1.11072	1.06786	1.26183	1.24766
RF6	169.568	157.927	154.938	149.769	136.302	132.038	170.597	166.071		RF6	1.01998	1.05452	1.07406	1.02738	0.888801	0.849477	1.21136	1.17716
RF7	117.776	118.421	124.088	122.125	122.566	122.885	127.836	126.03		RF7	0.809523	0.7949	0.958619	0.93944	0.908198	0.949588	0.997253	1.00839
RF8	83.3622	80.7101	106.035	107.202	109.744	99.9945	114.124	109.674		RF8	0.461332	0.46623	0.524219	0.520355	0.461643	0.484658	0.596758	0.580385
RF9	102.17	100.008	87.7321	84.3846	84.4894	82.721	92.5601	89.1084		RF9	0.535284	0.522292	0.508381	0.508952	0.470159	0.460611	0.559796	0.556126
	EDGAR v5.0 CO2										EDGAR v5.0 CH4
	ER2	ER5	GF2	GF5	HR2	HR5	NA2	NA5			ER2	ER5	GF2	GF5	HR2	HR5	NA2	NA5
RF1	114.608	115.085	111.972	111.034	96.4373	95.5437	90.1451	90.1685		RF1	0.433268	0.43249	0.457953	0.45701	0.380104	0.37738	0.353392	0.351451
RF2	137.388	136.619	156.453	154.393	169.208	171.293	166.909	165.572		RF2	0.496193	0.493087	0.56774	0.550351	0.60038	0.603836	0.585236	0.584935
RF3	98.0192	95.7412	81.3828	80.2305	98.1858	96.5893	82.6397	81.2159		RF3	0.434762	0.41922	0.370223	0.354075	0.42532	0.416682	0.373692	0.35625
RF4	98.4501	97.9179	82.4269	81.0238	96.6646	94.2067	111.608	106.65		RF4	0.404335	0.390506	0.32476	0.323341	0.383452	0.361982	0.430036	0.417896
RF5	127.606	120.975	112.521	111.769	118.454	112.073	142.147	139.055		RF5	0.469101	0.445842	0.426984	0.416051	0.454568	0.447525	0.526275	0.514646
RF6	145.555	135.165	133.6	130.929	116.597	113.594	143.326	143.687		RF6	0.523019	0.503697	0.469492	0.442062	0.495011	0.476252	0.506501	0.500584
RF7	104.81	99.1874	107.573	106.704	106.258	106.642	108.091	105.662		RF7	0.481646	0.477516	0.433341	0.435263	0.534738	0.528872	0.509198	0.507677
RF8	68.0755	65.2677	90.5408	88.0729	88.2926	83.2931	93.5025	90.1279		RF8	0.278199	0.277724	0.325614	0.31976	0.312043	0.314761	0.328519	0.327463
RF9	83.5	81.7724	73.6193	72.1357	73.3256	72.1949	76.8426	76.5378		RF9	0.31659	0.310809	0.296497	0.290133	0.292301	0.295076	0.309387	0.307674
	Vulcan CO2										Composite CH4
	ER2	ER5	GF2	GF5	HR2	HR5	NA2	NA5			ER2	ER5	GF2	GF5	HR2	HR5	NA2	NA5
RF1	126.826	126.564	123.473	122.404	104.134	102.824	99.0075	98.9798		RF1	0.799289	0.803175	0.784787	0.77452	0.707659	0.690075	0.628185	0.617186
RF2	146.095	145.191	164.505	162.584	174.875	174.232	171.486	169.739		RF2	0.721983	0.720249	0.769116	0.750736	0.813509	0.826339	0.808187	0.808382
RF3	110.638	108.235	88.6782	87.5597	110.691	105.956	92.289	89.7221		RF3	0.634079	0.626023	0.52012	0.506661	0.641674	0.620831	0.53959	0.520514
RF4	103.593	102.766	85.7128	86.0741	103.201	99.583	115.402	108.077		RF4	0.575434	0.57065	0.48171	0.486741	0.586764	0.582717	0.631979	0.625338
RF5	132.137	128.894	115.283	114.76	130.416	121.257	151.173	147.233		RF5	1.0133	0.981689	0.963639	0.940115	0.967502	0.936991	1.10302	1.08611
RF6	151.756	141.102	133.873	124.175	128.111	122.383	147.214	145.106		RF6	0.813919	0.839117	0.80937	0.793533	0.731171	0.716794	0.8942	0.894498
RF7	105.352	103.494	108.913	107.685	108.655	107.993	111.426	108.926		RF7	0.699425	0.688424	0.778696	0.772833	0.770876	0.796408	0.817662	0.826359
RF8	69.083	68.6893	93.3278	92.82	89.0752	88.2616	98.2432	94.2276		RF8	0.377864	0.377929	0.470294	0.449905	0.404507	0.414849	0.545549	0.488397
RF9	90.3242	88.6003	75.3285	74.5508	74.9873	75.967	80.8246	80.4088		RF9	0.505722	0.469673	0.444466	0.405345	0.425448	0.433921	0.481268	0.47828
											GEPA CH4
											ER2	ER5	GF2	GF5	HR2	HR5	NA2	NA5
										RF1	0.425026	0.42194	0.443292	0.44056	0.384232	0.37821	0.351654	0.350512
										RF2	0.469933	0.462733	0.508988	0.494472	0.562384	0.557381	0.53993	0.539274
										RF3	0.392383	0.378456	0.34339	0.330335	0.38378	0.375455	0.346666	0.335498
										RF4	0.411845	0.39212	0.340409	0.330728	0.405202	0.375269	0.483855	0.463204
										RF5	0.516105	0.508871	0.4534	0.45401	0.498591	0.477654	0.546768	0.545547
										RF6	0.403907	0.396207	0.351927	0.34903	0.416999	0.404221	0.369151	0.373664
										RF7	0.435874	0.432896	0.430388	0.433837	0.487666	0.472177	0.464927	0.468714
										RF8	0.26519	0.266115	0.311363	0.306076	0.294837	0.300608	0.304797	0.302929
										RF9	0.315124	0.306218	0.291515	0.282055	0.274361	0.270202	0.298156	0.304159
	CO2 summary stats										CH4 summary stats
	Prior totals:										Prior totals:
	ACES	116.21									EDGAR v4.2	1.26973
	EDGAR v5.0	87.3244									EDGAR v5.0	0.260948
	Vulcan	104.524									Composite	0.76432
											GEPA	0.258912
	Posterior totals:										Posterior totals:
	Overall	116.368									Overall	0.581782
		Flight avg			Prior avg			Model avg				Flight avg			Prior avg			Model avg
	RF1	116.127		ACES	128.577		ER2	118.039			RF1	0.620338		EDGAR v4.2	0.825344		ER2	0.582593
	RF2	169.378		EDGAR v5.0	107.429		ER5	115.247			RF2	0.706089		EDGAR v5.0	0.421385		ER5	0.577267
	RF3	99.0997		Vulcan	113.099		GF2	113.784			RF3	0.494685		Composite	0.680323		GF2	0.56904
	RF4	103.49					GF5	112.068			RF4	0.521968		GEPA	0.400074		GF5	0.559026
	RF5	133.039		Sdev	10.9467		HR2	116.189			RF5	0.773729					HR2	0.57895
	RF6	141.391		Rel Sdev	9.40694	%	HR5	113.495			RF6	0.680533		Sdev	0.20638		HR5	0.574792
	RF7	112.046					NA2	122.451			RF7	0.657854		Rel Sdev	35.4737	%	NA2	0.609775
	RF8	90.4894					NA5	119.673			RF8	0.389402					NA5	0.60281
	RF9	82.2539									RF9	0.391437
							Sdev	3.49332									Sdev	0.0168348
	Sdev	27.4553					Rel Sdev	3.00195	%		Sdev	0.138621					Rel Sdev	2.89366	%
	Rel Sdev	23.5935	%								Rel Sdev	23.8269	%

## Sheet: Pb2
	ACES CO2										EDGAR v4.2 CH4
	ER2	ER5	GF2	GF5	HR2	HR5	NA2	NA5			ER2	ER5	GF2	GF5	HR2	HR5	NA2	NA5
RF1	162.76	162.956	154.149	152.331	123.698	122.593	117.866	116.818		RF1	0.997038	1.01022	0.941252	0.917046	0.81186	0.78026	0.71151	0.694408
RF2	180.249	178.895	197.9	197.673	216.665	218.491	209.85	203.073		RF2	0.822632	0.844369	0.914643	0.922553	0.932385	0.950338	0.936013	0.930932
RF3	116.156	115.146	94.8999	93.2938	117.241	114.351	101.657	99.9383		RF3	0.611957	0.606201	0.487269	0.475327	0.589945	0.635293	0.520492	0.508214
RF4	111.879	111.58	89.1335	91.7648	107.87	102.029	131.516	124.14		RF4	0.667773	0.691776	0.541966	0.555503	0.694342	0.697816	0.727193	0.728747
RF5	147.043	146.414	132.978	129.205	160.385	154.473	179.112	171.998		RF5	1.06372	1.0258	1.05366	1.04382	1.18271	1.11147	1.25174	1.2383
RF6	186.962	173.763	179.047	172.616	144.353	140.257	204.053	196.021		RF6	0.933169	0.987389	1.02695	0.954469	0.836332	0.787214	1.208	1.1462
RF7	115.324	116.704	130.787	128.294	128.826	129.422	133.155	130.773		RF7	0.685637	0.676585	0.876224	0.85018	0.851107	0.883648	0.875448	0.899879
RF8	77.9415	74.3977	100.426	101.818	103.231	92.4404	110.013	104.746		RF8	0.388881	0.390964	0.433168	0.43086	0.375831	0.389404	0.491149	0.474549
RF9	100.425	98.108	84.0177	79.6703	79.5047	77.5389	89.3017	84.6006		RF9	0.475858	0.461264	0.462417	0.461676	0.397091	0.388065	0.503779	0.499759
	EDGAR v5.0 CO2										EDGAR v5.0 CH4
	ER2	ER5	GF2	GF5	HR2	HR5	NA2	NA5			ER2	ER5	GF2	GF5	HR2	HR5	NA2	NA5
RF1	128.107	128.713	121.903	121.098	96.1064	95.3054	89.9814	90.0833		RF1	0.557032	0.556079	0.584938	0.581785	0.432029	0.423998	0.393283	0.389395
RF2	146.497	145.59	170.472	169.138	190.244	192.597	182.782	180.444		RF2	0.548436	0.544531	0.648865	0.629153	0.708031	0.711281	0.672775	0.67024
RF3	99.6038	97.3194	79.4649	78.2336	100.824	99.5787	82.9272	81.1822		RF3	0.507608	0.48631	0.404387	0.383	0.493282	0.483783	0.417237	0.393971
RF4	96.0478	95.9848	76.8801	76.2813	93.7462	91.4093	114.418	110.139		RF4	0.433728	0.415849	0.333948	0.335268	0.406467	0.379573	0.482831	0.473127
RF5	130.716	123.016	113.868	112.703	131.17	120.947	154.674	150.718		RF5	0.566271	0.533308	0.511469	0.49989	0.573671	0.560171	0.652074	0.637542
RF6	168.674	154.895	160.537	156.708	124.632	121.3	180.595	180.437		RF6	0.666483	0.633933	0.623198	0.576139	0.576532	0.554818	0.702873	0.699558
RF7	106.726	99.3117	114.979	113.261	115.683	116.356	118.25	115.183		RF7	0.579125	0.569236	0.530075	0.534231	0.655446	0.67858	0.656552	0.663483
RF8	64.5878	61.2474	88.7037	85.7503	84.1555	77.9776	92.3845	88.0942		RF8	0.284271	0.283561	0.362935	0.35214	0.336603	0.336818	0.387781	0.379514
RF9	83.5414	81.7915	72.5807	70.878	72.1203	70.8855	76.2642	75.9749		RF9	0.347454	0.337606	0.31481	0.305132	0.307241	0.311688	0.335799	0.333083
	Vulcan CO2										Composite CH4
	ER2	ER5	GF2	GF5	HR2	HR5	NA2	NA5			ER2	ER5	GF2	GF5	HR2	HR5	NA2	NA5
RF1	137.54	137.181	130.731	129.886	103.302	102.178	97.9525	97.8415		RF1	0.819413	0.828999	0.786915	0.772137	0.645878	0.626235	0.55075	0.540925
RF2	157.281	156.05	174.486	174.109	191.44	192.928	183.528	181.294		RF2	0.693601	0.692681	0.764688	0.747756	0.828508	0.841657	0.801156	0.791686
RF3	110.039	107.787	86.4224	84.9952	111.674	106.97	91.3958	88.9069		RF3	0.596699	0.588545	0.477016	0.461856	0.605483	0.58044	0.514909	0.492762
RF4	100.176	99.6885	80.2281	81.2349	100.384	96.3364	118.231	110.518		RF4	0.550748	0.546779	0.446314	0.451588	0.554173	0.539674	0.620273	0.613923
RF5	133.961	132.211	116.05	114.797	146.836	135.621	161.99	157.526		RF5	1.04814	0.997561	1.01976	0.995022	1.08687	1.0315	1.18863	1.1689
RF6	169.105	157.38	154.845	144.641	136.95	129.963	176.501	171.97		RF6	0.838071	0.888481	0.868174	0.840312	0.743012	0.727929	1.0069	1.00305
RF7	104.052	101.679	112.484	111.072	113.808	114.413	116.339	113.159		RF7	0.649906	0.644666	0.785342	0.77398	0.787908	0.808193	0.825128	0.846354
RF8	64.9243	63.5083	89.7904	88.9513	83.7301	82.1658	96.1124	91.0484		RF8	0.332146	0.331375	0.407812	0.389012	0.339824	0.345984	0.485307	0.418736
RF9	88.4515	86.6904	71.149	70.2769	70.2391	72.0834	77.7401	77.3693		RF9	0.473862	0.428556	0.417431	0.365112	0.375496	0.389663	0.449872	0.447106
											GEPA CH4
											ER2	ER5	GF2	GF5	HR2	HR5	NA2	NA5
										RF1	0.534983	0.530763	0.55283	0.54504	0.43133	0.421287	0.379356	0.376376
										RF2	0.525015	0.516461	0.594722	0.579487	0.683596	0.67781	0.635969	0.633669
										RF3	0.467959	0.448208	0.379488	0.362017	0.452281	0.44186	0.398523	0.383967
										RF4	0.443438	0.421926	0.356228	0.34721	0.42878	0.389736	0.542253	0.524123
										RF5	0.669328	0.645993	0.590287	0.5784	0.647773	0.599704	0.736813	0.723288
										RF6	0.563719	0.548491	0.481534	0.475356	0.517644	0.499511	0.540696	0.550818
										RF7	0.529198	0.523444	0.567941	0.569115	0.619385	0.601812	0.634162	0.640368
										RF8	0.265939	0.267257	0.344064	0.335435	0.317528	0.327078	0.345771	0.33929
										RF9	0.34892	0.333264	0.309047	0.294443	0.278578	0.271794	0.322183	0.331677
	CO2 summary stats										CH4 summary stats
	Prior totals:										Prior totals:
	ACES	116.21									EDGAR v4.2	1.26973
	EDGAR v5.0	87.3244									EDGAR v5.0	0.260948
	Vulcan	104.524									Composite	0.76432
											GEPA	0.258912
	Posterior totals:										Posterior totals:
	Overall	120.872									Overall	0.600014
		Flight avg			Prior avg			Model avg				Flight avg			Prior avg			Model avg
	RF1	121.712		ACES	132.343		ER2	121.806			RF1	0.628917		EDGAR v4.2	0.754606		ER2	0.596893
	RF2	182.986		EDGAR v5.0	113.269		ER5	118.815			RF2	0.731114		EDGAR v5.0	0.494907		ER5	0.589956
	RF3	98.3336		Vulcan	117.004		GF2	117.737			RF3	0.489259		Composite	0.671462		GF2	0.588938
	RF4	100.484					GF5	115.951			RF4	0.510721		GEPA	0.47908		GF5	0.574762
	RF5	139.934		Sdev	10.1082		HR2	120.327			RF5	0.85105					HR2	0.59736
	RF6	161.925		Rel Sdev	8.36271	%	HR5	117.43			RF6	0.750217		Sdev	0.135001		HR5	0.588502
	RF7	116.668					NA2	129.207			RF7	0.69601		Rel Sdev	22.4997	%	NA2	0.636255
	RF8	86.1727					NA5	125.704			RF8	0.365343					NA5	0.627442
	RF9	79.6335									RF9	0.377491
							Sdev	4.53722									Sdev	0.0209642
	Sdev	34.9171					Rel Sdev	3.75373	%		Sdev	0.172353					Rel Sdev	3.49395	%
	Rel Sdev	28.8876	%								Rel Sdev	28.7248	%

## Sheet: Pb3
	ACES CO2										EDGAR v4.2 CH4
	ER2	ER5	GF2	GF5	HR2	HR5	NA2	NA5			ER2	ER5	GF2	GF5	HR2	HR5	NA2	NA5
RF1	165.874	166.061	155.905	154.313	122.786	121.88	117.049	116.024		RF1	0.987417	1.00323	0.927355	0.902857	0.782454	0.750251	0.679952	0.663675
RF2	180.761	179.579	198.749	199.163	218.857	220.831	211.506	204.128		RF2	0.797716	0.818602	0.901971	0.913152	0.921815	0.938162	0.921469	0.912833
RF3	115.259	114.319	94.2318	92.6377	116.79	114.04	101.116	99.415		RF3	0.605544	0.598406	0.482517	0.469657	0.585362	0.629899	0.515062	0.502248
RF4	109.308	108.879	87.3894	89.5044	107.284	101.039	130.527	123.286		RF4	0.653042	0.677103	0.527444	0.538612	0.681584	0.682344	0.716574	0.71821
RF5	146.832	146.986	131.248	127.576	163.437	158.044	179.284	172.037		RF5	1.05505	1.01837	1.04037	1.03111	1.19908	1.12138	1.24384	1.23142
RF6	188.849	175.694	182.867	176.634	145.321	141.258	208.882	200.251		RF6	0.925639	0.980317	1.02589	0.950175	0.83203	0.780973	1.2108	1.14604
RF7	114.441	115.881	131.644	129.133	129.308	129.871	133.189	130.781		RF7	0.674897	0.665795	0.871609	0.844124	0.849101	0.878735	0.859565	0.887141
RF8	76.5064	72.8802	99.1447	100.478	101.485	90.801	108.81	103.474		RF8	0.378446	0.379256	0.419637	0.417809	0.363687	0.375098	0.475803	0.459273
RF9	99.971	97.6512	83.203	78.8422	78.9263	76.9743	88.5424	83.7178		RF9	0.471679	0.456938	0.458901	0.457979	0.390828	0.381746	0.498982	0.494841
	EDGAR v5.0 CO2										EDGAR v5.0 CH4
	ER2	ER5	GF2	GF5	HR2	HR5	NA2	NA5			ER2	ER5	GF2	GF5	HR2	HR5	NA2	NA5
RF1	130.269	130.855	122.965	122.296	95.3494	94.6866	89.4399	89.5376		RF1	0.581064	0.580277	0.605931	0.60245	0.43882	0.430194	0.399407	0.395192
RF2	146.76	145.844	172.459	171.294	193.452	195.738	185.087	182.491		RF2	0.554925	0.55066	0.662062	0.642083	0.726724	0.729335	0.686613	0.68356
RF3	99.4542	97.1698	79.0478	77.7655	100.938	99.7998	82.7342	80.9335		RF3	0.51748	0.495598	0.409115	0.387071	0.502381	0.492945	0.423883	0.399775
RF4	94.9193	94.8755	75.7246	75.0914	93.2448	90.7949	114.333	110.326		RF4	0.437206	0.418889	0.334565	0.336106	0.409528	0.381841	0.490258	0.481594
RF5	129.854	122.571	111.776	110.627	132.886	122.04	154.569	150.565		RF5	0.579217	0.546625	0.520003	0.509396	0.593193	0.576727	0.669516	0.653843
RF6	171.081	157.205	164.459	160.686	125.652	122.342	185.706	185.313		RF6	0.685089	0.651771	0.647012	0.59762	0.588384	0.566835	0.733135	0.730898
RF7	106.268	98.6411	115.628	113.789	116.524	117.234	118.974	115.891		RF7	0.589066	0.577575	0.542809	0.547207	0.672173	0.700122	0.677656	0.686244
RF8	63.6616	60.3164	88.0106	85.0016	82.9356	76.6938	91.5767	87.2324		RF8	0.285955	0.285014	0.365844	0.354571	0.337302	0.33669	0.394398	0.384645
RF9	83.3462	81.6094	72.023	70.3782	71.8624	70.6404	75.779	75.4786		RF9	0.351688	0.341288	0.31751	0.307288	0.309225	0.313981	0.340041	0.337158
	Vulcan CO2										Composite CH4
	ER2	ER5	GF2	GF5	HR2	HR5	NA2	NA5			ER2	ER5	GF2	GF5	HR2	HR5	NA2	NA5
RF1	139.618	139.147	131.733	131.05	102.691	101.693	97.2571	97.1229		RF1	0.822919	0.834725	0.784153	0.768695	0.628673	0.609223	0.532067	0.523195
RF2	157.893	156.595	175.417	175.385	193.458	195.356	184.901	182.51		RF2	0.681969	0.680633	0.762133	0.747032	0.830949	0.842917	0.798168	0.78608
RF3	109.649	107.487	86.133	84.6267	111.649	107.061	91.1815	88.7613		RF3	0.59326	0.585046	0.473236	0.458072	0.602404	0.577606	0.513068	0.490868
RF4	98.4852	97.9652	78.7461	79.5452	99.6866	95.4361	117.706	110.063		RF4	0.545958	0.54284	0.439861	0.444683	0.547735	0.53121	0.618167	0.612703
RF5	133.697	132.55	114.914	113.504	149.609	138.574	162.294	157.693		RF5	1.04445	0.992902	1.01522	0.991707	1.10467	1.04259	1.18784	1.1687
RF6	171.377	159.762	158.783	149.344	138.372	131.086	181.446	176.419		RF6	0.840059	0.893168	0.878455	0.84774	0.744603	0.729126	1.02284	1.01813
RF7	103.433	100.83	113.013	111.498	114.219	115.206	116.548	113.288		RF7	0.643077	0.638524	0.787633	0.774311	0.791719	0.809869	0.822498	0.846606
RF8	64.2781	62.5755	89.0413	88.109	82.6702	80.9584	95.576	90.3477		RF8	0.325692	0.324343	0.398513	0.380621	0.331992	0.33685	0.474937	0.408237
RF9	88.0971	86.3542	70.4202	69.5718	69.6985	71.6584	77.0724	76.6818		RF9	0.471109	0.424662	0.41488	0.360835	0.369839	0.384605	0.4466	0.443839
											GEPA CH4
											ER2	ER5	GF2	GF5	HR2	HR5	NA2	NA5
										RF1	0.555622	0.551401	0.57022	0.56128	0.436236	0.425703	0.381608	0.378149
										RF2	0.53356	0.524903	0.611021	0.595986	0.70678	0.700501	0.653638	0.65097
										RF3	0.478087	0.457546	0.384254	0.366188	0.461011	0.450442	0.40572	0.390915
										RF4	0.447954	0.426405	0.358932	0.350045	0.432651	0.392522	0.550256	0.53356
										RF5	0.688075	0.661682	0.606241	0.591629	0.668914	0.615671	0.760347	0.744863
										RF6	0.591661	0.575742	0.509494	0.50266	0.532761	0.514397	0.579872	0.590717
										RF7	0.540621	0.534674	0.590048	0.590065	0.639399	0.6213	0.662245	0.669521
										RF8	0.265333	0.266697	0.346009	0.337201	0.319119	0.329191	0.34968	0.342044
										RF9	0.352988	0.33629	0.310898	0.295506	0.278276	0.271064	0.324888	0.334935
	CO2 summary stats										CH4 summary stats
	Prior totals:										Prior totals:
	ACES	116.21									EDGAR v4.2	1.26973
	EDGAR v5.0	87.3244									EDGAR v5.0	0.260948
	Vulcan	104.524									Composite	0.76432
											GEPA	0.258912
	Posterior totals:										Posterior totals:
	Overall	121.15									Overall	0.60248
		Flight avg			Prior avg			Model avg				Flight avg			Prior avg			Model avg
	RF1	122.317		ACES	132.491		ER2	121.85			RF1	0.62795		EDGAR v4.2	0.744595		ER2	0.598709
	RF2	184.509		EDGAR v5.0	113.646		ER5	118.899			RF2	0.733404		EDGAR v5.0	0.505448		ER5	0.591608
	RF3	98.0083		Vulcan	117.314		GF2	117.951			RF3	0.490771		Composite	0.66867		GF2	0.591715
	RF4	99.34					GF5	116.216			RF4	0.508137		GEPA	0.491205		GF5	0.577042
	RF5	140.132		Sdev	9.99118		HR2	120.707			RF5	0.858582					HR2	0.600317
	RF6	164.95		Rel Sdev	8.24694	%	HR5	117.842			RF6	0.763251		Sdev	0.124332		HR5	0.590334
	RF7	116.885					NA2	129.67			RF7	0.702685		Rel Sdev	20.6367	%	NA2	0.639483
	RF8	85.1068					NA5	126.065			RF8	0.360934					NA5	0.630628
	RF9	79.1042									RF9	0.376603
							Sdev	4.5984									Sdev	0.0214113
	Sdev	36.0396					Rel Sdev	3.79562	%		Sdev	0.176781					Rel Sdev	3.55386	%
	Rel Sdev	29.7479	%								Rel Sdev	29.3422	%

[truncated: 8 more sheets: Pb4, Pb5, Pb6, Pb7, Pb8, non_nested, Base_Case_5borough, representative_inventory]
